# Supplementary material for: Fragranced consumer products: effects on asthmatic Australians
Source: PubMed Central journal article supplement (PMC5954056; doi:10.1007/s11869-018-0560-x), 2018-03-17
Supplement: 11869_2018_560_MOESM1_ESM.pdf [file 11869_2018_560_MOESM1_ESM.pdf]

Supplementary Material 2 - Survey results

Table 1

Asthmatic, Non-Asthmatic, and General Population proportions

|       | Asthmatic      | Non-Asthmatic  | GenPop          |
|-------|----------------|----------------|-----------------|
| Total | 313<br>100.00% | 785<br>100.00% | 1098<br>100.00% |

**Table 2**

What is your gender?

|               | Asthmatic      | Non-Asthmatic  | GenPop          |
|---------------|----------------|----------------|-----------------|
| <b>Total</b>  | 313<br>100.00% | 785<br>100.00% | 1098<br>100.00% |
| <b>Male</b>   | 143<br>45.70%  | 400<br>51.00%  | 543<br>49.50%   |
| <b>Female</b> | 170<br>54.30%  | 385<br>49.00%  | 555<br>50.50%   |
| <b>Other</b>  | -<br>-         | -<br>-         | -<br>-          |
| <b>SUM</b>    | 313<br>100.00% | 785<br>100.00% | 1098<br>100.00% |

**Table 3**

What is your age?

|                           | Asthmatic      | Non-Asthmatic  | GenPop          |
|---------------------------|----------------|----------------|-----------------|
| <b>Total</b>              | 313<br>100.00% | 785<br>100.00% | 1098<br>100.00% |
| <b>18-24 (21)</b>         | 42<br>13.40%   | 114<br>14.50%  | 156<br>14.20%   |
| <b>25-34 (29.5)</b>       | 69<br>22.00%   | 170<br>21.70%  | 239<br>21.80%   |
| <b>35-44 (39.5)</b>       | 75<br>24.00%   | 181<br>23.10%  | 256<br>23.30%   |
| <b>45-54 (49.5)</b>       | 75<br>24.00%   | 166<br>21.10%  | 241<br>21.90%   |
| <b>55-65 (60)</b>         | 52<br>16.60%   | 154<br>19.60%  | 206<br>18.80%   |
| <b>65 (65)</b>            | -<br>-         | -<br>-         | -<br>-          |
| <b>Mean</b>               | 40.62          | 40.78          | 40.74           |
| <b>Standard Deviation</b> | 12.69          | 13.17          | 13.03           |
| <b>Standard Error</b>     | 0.72           | 0.47           | 0.39            |
| <b>SUM</b>                | 313<br>100.00% | 785<br>100.00% | 1098<br>100.00% |

**Table 4**

**AUSTRALIA Region.**

|                                     | Asthmatic      | Non-Asthmatic  | GenPop          |
|-------------------------------------|----------------|----------------|-----------------|
| <b>Total</b>                        | 313<br>100.00% | 785<br>100.00% | 1098<br>100.00% |
| <b>Australian Capital Territory</b> | 6<br>1.90%     | 14<br>1.80%    | 20<br>1.80%     |
| <b>New South Wales</b>              | 98<br>31.30%   | 262<br>33.40%  | 360<br>32.80%   |
| <b>Northern Territory</b>           | 2<br>0.60%     | 5<br>0.60%     | 7<br>0.60%      |
| <b>Queensland</b>                   | 66<br>21.10%   | 151<br>19.20%  | 217<br>19.80%   |
| <b>South Australia</b>              | 25<br>8.00%    | 60<br>7.60%    | 85<br>7.70%     |
| <b>Tasmania</b>                     | 7<br>2.20%     | 18<br>2.30%    | 25<br>2.30%     |
| <b>Victoria</b>                     | 77<br>24.60%   | 201<br>25.60%  | 278<br>25.30%   |
| <b>Western Australia</b>            | 32<br>10.20%   | 74<br>9.40%    | 106<br>9.70%    |
| <b>SUM</b>                          | 313<br>100.00% | 785<br>100.00% | 1098<br>100.00% |

Table 5

Q1. Which fragranced products are you exposed to, at least once a week, from your own use?

|                                                                                                      | Asthmatic       | Non-Asthmatic   | GenPop          |
|------------------------------------------------------------------------------------------------------|-----------------|-----------------|-----------------|
| <b>Total</b>                                                                                         | 313<br>100.00%  | 785<br>100.00%  | 1098<br>100.00% |
| <b>Air fresheners and deodorizers (e.g., sprays, solids, oils, disks)</b>                            | 220<br>70.30%   | 513<br>65.40%   | 733<br>66.80%   |
| <b>Personal care products (e.g., soaps, hand sanitizer, lotions, deodorant, sunscreen, shampoos)</b> | 293<br>93.60%   | 713<br>90.80%   | 1006<br>91.60%  |
| <b>Cleaning supplies (e.g., all-purpose cleaners, disinfectants, and dishwashing soap)</b>           | 263<br>84.00%   | 650<br>82.80%   | 913<br>83.20%   |
| <b>Laundry products (e.g., detergents, fabric softeners, dryer sheets)</b>                           | 273<br>87.20%   | 653<br>83.20%   | 926<br>84.30%   |
| <b>Household products (e.g., scented candles, toilet paper, trash bags, baby products)</b>           | 247<br>78.90%   | 600<br>76.40%   | 847<br>77.10%   |
| <b>Fragrance (e.g., perfume, cologne, after-shave)</b>                                               | 223<br>71.20%   | 541<br>68.90%   | 764<br>69.60%   |
| <b>Other</b>                                                                                         | 5<br>1.60%      | 20<br>2.50%     | 25<br>2.30%     |
| <b>None</b>                                                                                          | 3<br>1.00%      | 19<br>2.40%     | 22<br>2.00%     |
| <b>SUM</b>                                                                                           | 1527<br>487.90% | 3709<br>472.50% | 5236<br>476.90% |

Table 6

Q1a. Which fragranced products are you exposed to, at least once a week, from others' use?

|                                                                                                      | Asthmatic       | Non-Asthmatic   | GenPop          |
|------------------------------------------------------------------------------------------------------|-----------------|-----------------|-----------------|
| <b>Total</b>                                                                                         | 313<br>100.00%  | 785<br>100.00%  | 1098<br>100.00% |
| <b>Air fresheners and deodorizers (e.g., sprays, solids, oils, disks)</b>                            | 174<br>55.60%   | 384<br>48.90%   | 558<br>50.80%   |
| <b>Personal care products (e.g., soaps, hand sanitizer, lotions, deodorant, sunscreen, shampoos)</b> | 206<br>65.80%   | 469<br>59.70%   | 675<br>61.50%   |
| <b>Cleaning supplies (e.g., all-purpose cleaners, disinfectants, and dishwashing soap)</b>           | 169<br>54.00%   | 388<br>49.40%   | 557<br>50.70%   |
| <b>Laundry products (e.g., detergents, fabric softeners, dryer sheets)</b>                           | 140<br>44.70%   | 346<br>44.10%   | 486<br>44.30%   |
| <b>Household products (e.g., scented candles, toilet paper, trash bags, baby products)</b>           | 162<br>51.80%   | 383<br>48.80%   | 545<br>49.60%   |
| <b>Fragrance (e.g., perfume, cologne, after-shave)</b>                                               | 237<br>75.70%   | 507<br>64.60%   | 744<br>67.80%   |
| <b>Other</b>                                                                                         | 6<br>1.90%      | 14<br>1.80%     | 20<br>1.80%     |
| <b>None</b>                                                                                          | 24<br>7.70%     | 107<br>13.60%   | 131<br>11.90%   |
| <b>SUM</b>                                                                                           | 1118<br>357.20% | 2598<br>331.00% | 3716<br>338.40% |

**Table 7**

**Q2. Do you experience any health problems when exposed to air fresheners or deodorizers?**

|                            | <b>Asthmatic</b> | <b>Non-Asthmatic</b> | <b>GenPop</b>   |
|----------------------------|------------------|----------------------|-----------------|
| <b>Total</b>               | 313<br>100.00%   | 785<br>100.00%       | 1098<br>100.00% |
| <b>Yes</b>                 | 106<br>33.90%    | 74<br>9.40%          | 180<br>16.40%   |
| <b>No</b>                  | 164<br>52.40%    | 596<br>75.90%        | 760<br>69.20%   |
| <b>Don't know/not sure</b> | 43<br>13.70%     | 114<br>14.50%        | 157<br>14.30%   |
| <b>Decline to answer</b>   | -<br>-           | 1<br>0.10%           | 1<br>0.10%      |
| <b>SUM</b>                 | 313<br>100.00%   | 785<br>100.00%       | 1098<br>100.00% |

**Table 8**

**BA. Which of the following health problems do you experience?**

Base: Respondents who experienced below health problems when exposed to air fresheners or deodorizers

|                                                                                                     | Asthmatic | Non-Asthmatic | GenPop  |
|-----------------------------------------------------------------------------------------------------|-----------|---------------|---------|
| <b>Total</b>                                                                                        | 106       | 74            | 180     |
|                                                                                                     | 100.00%   | 100.00%       | 100.00% |
| <b>Migraine headaches</b>                                                                           | 31        | 15            | 46      |
|                                                                                                     | 29.20%    | 20.30%        | 25.60%  |
| <b>Asthma attacks</b>                                                                               | 44        | 5             | 49      |
|                                                                                                     | 41.50%    | 6.80%         | 27.20%  |
| <b>Neurological problems (e.g., dizziness, seizures, head pain, fainting, loss of coordination)</b> | 18        | 6             | 24      |
|                                                                                                     | 17.00%    | 8.10%         | 13.30%  |
| <b>Respiratory problems (e.g., difficulty breathing, coughing, shortness of breath)</b>             | 65        | 35            | 100     |
|                                                                                                     | 61.30%    | 47.30%        | 55.60%  |
| <b>Skin problems (e.g., rashes, hives, red skin, tingling skin, dermatitis)</b>                     | 29        | 24            | 53      |
|                                                                                                     | 27.40%    | 32.40%        | 29.40%  |
| <b>Cognitive problems (e.g., difficulties thinking, concentrating, or remembering)</b>              | 14        | 7             | 21      |
|                                                                                                     | 13.20%    | 9.50%         | 11.70%  |
| <b>Mucosal symptoms (e.g., watery or red eyes, nasal congestion, sneezing)</b>                      | 43        | 25            | 68      |
|                                                                                                     | 40.60%    | 33.80%        | 37.80%  |
| <b>Immune system problems (e.g., swollen lymph glands, fever, fatigue)</b>                          | 13        | 7             | 20      |
|                                                                                                     | 12.30%    | 9.50%         | 11.10%  |
| <b>Gastrointestinal problems (e.g., nausea, bloating, cramping, diarrhea)</b>                       | 12        | 4             | 16      |
|                                                                                                     | 11.30%    | 5.40%         | 8.90%   |
| <b>Cardiovascular problems (e.g., fast or irregular heartbeat, jitteriness, chest discomfort)</b>   | 13        | 8             | 21      |
|                                                                                                     | 12.30%    | 10.80%        | 11.70%  |
| <b>Musculoskeletal problems (e.g., muscle or joint pain, cramps, weakness)</b>                      | 11        | 7             | 18      |
|                                                                                                     | 10.40%    | 9.50%         | 10.00%  |
| <b>Other</b>                                                                                        | -         | 6             | 6       |
|                                                                                                     | -         | 8.10%         | 3.30%   |
| <b>SUM</b>                                                                                          | 293       | 149           | 442     |
|                                                                                                     | 276.40%   | 201.40%       | 245.60% |



**Table 9**

**Q3. Do you experience any health problems from the scent of laundry products coming from a dryer vent?**

|                            | Asthmatic      | Non-Asthmatic  | GenPop          |
|----------------------------|----------------|----------------|-----------------|
| <b>Total</b>               | 313<br>100.00% | 785<br>100.00% | 1098<br>100.00% |
| <b>Yes</b>                 | 38<br>12.10%   | 29<br>3.70%    | 67<br>6.10%     |
| <b>No</b>                  | 231<br>73.80%  | 678<br>86.40%  | 909<br>82.80%   |
| <b>Don't know/not sure</b> | 44<br>14.10%   | 76<br>9.70%    | 120<br>10.90%   |
| <b>Decline to answer</b>   | -              | 2<br>0.30%     | 2<br>0.20%      |
| <b>SUM</b>                 | 313<br>100.00% | 785<br>100.00% | 1098<br>100.00% |

**Table 10**

**BA. Which of the following health problems do you experience?**

Base: Respondents who experienced below health problems from the scent of laundry products coming from a dryer vent

|                                                                                                     | Asthmatic | Non-Asthmatic | GenPop  |
|-----------------------------------------------------------------------------------------------------|-----------|---------------|---------|
| <b>Total</b>                                                                                        | 38        | 29            | 67      |
|                                                                                                     | 100.00%   | 100.00%       | 100.00% |
| <b>Migraine headaches</b>                                                                           | 7         | 7             | 14      |
|                                                                                                     | 18.40%    | 24.10%        | 20.90%  |
| <b>Asthma attacks</b>                                                                               | 14        | 1             | 15      |
|                                                                                                     | 36.80%    | 3.40%         | 22.40%  |
| <b>Neurological problems (e.g., dizziness, seizures, head pain, fainting, loss of coordination)</b> | 8         | -             | 8       |
|                                                                                                     | 21.10%    | -             | 11.90%  |
| <b>Respiratory problems (e.g., difficulty breathing, coughing, shortness of breath)</b>             | 16        | 12            | 28      |
|                                                                                                     | 42.10%    | 41.40%        | 41.80%  |
| <b>Skin problems (e.g., rashes, hives, red skin, tingling skin, dermatitis)</b>                     | 15        | 8             | 23      |
|                                                                                                     | 39.50%    | 27.60%        | 34.30%  |
| <b>Cognitive problems (e.g., difficulties thinking, concentrating, or remembering)</b>              | 8         | 3             | 11      |
|                                                                                                     | 21.10%    | 10.30%        | 16.40%  |
| <b>Mucosal symptoms (e.g., watery or red eyes, nasal congestion, sneezing)</b>                      | 13        | 4             | 17      |
|                                                                                                     | 34.20%    | 13.80%        | 25.40%  |
| <b>Immune system problems (e.g., swollen lymph glands, fever, fatigue)</b>                          | 16        | 4             | 20      |
|                                                                                                     | 42.10%    | 13.80%        | 29.90%  |
| <b>Gastrointestinal problems (e.g., nausea, bloating, cramping, diarrhea)</b>                       | 10        | 3             | 13      |
|                                                                                                     | 26.30%    | 10.30%        | 19.40%  |
| <b>Cardiovascular problems (e.g., fast or irregular heartbeat, jitteriness, chest discomfort)</b>   | 13        | 2             | 15      |
|                                                                                                     | 34.20%    | 6.90%         | 22.40%  |
| <b>Musculoskeletal problems (e.g., muscle or joint pain, cramps, weakness)</b>                      | 9         | 1             | 10      |
|                                                                                                     | 23.70%    | 3.40%         | 14.90%  |
| <b>Other</b>                                                                                        | -         | 2             | 2       |
|                                                                                                     | -         | 6.90%         | 3.00%   |
| <b>SUM</b>                                                                                          | 129       | 47            | 176     |
|                                                                                                     | 339.50%   | 162.10%       | 262.70% |

**Table 11**

**Q4. Do you experience any health problems from being in a room after it has been cleaned with scented products?**

|                            | Asthmatic      | Non-Asthmatic  | GenPop          |
|----------------------------|----------------|----------------|-----------------|
| <b>Total</b>               | 313<br>100.00% | 785<br>100.00% | 1098<br>100.00% |
| <b>Yes</b>                 | 96<br>30.70%   | 72<br>9.20%    | 168<br>15.30%   |
| <b>No</b>                  | 192<br>61.30%  | 625<br>79.60%  | 817<br>74.40%   |
| <b>Don't know/not sure</b> | 25<br>8.00%    | 85<br>10.80%   | 110<br>10.00%   |
| <b>Decline to answer</b>   | -              | 3<br>0.40%     | 3<br>0.30%      |
| <b>SUM</b>                 | 313<br>100.00% | 785<br>100.00% | 1098<br>100.00% |

**Table 12**

**BA. Which of the following health problems do you experience?**

**Base: Respondents who experienced below health problems from being in a room after it has been cleaned with scented products**

|                                                                                                     | Asthmatic | Non-Asthmatic | GenPop  |
|-----------------------------------------------------------------------------------------------------|-----------|---------------|---------|
| <b>Total</b>                                                                                        | 96        | 72            | 168     |
|                                                                                                     | 100.00%   | 100.00%       | 100.00% |
| <b>Migraine headaches</b>                                                                           | 22        | 16            | 38      |
|                                                                                                     | 22.90%    | 22.20%        | 22.60%  |
| <b>Asthma attacks</b>                                                                               | 26        | 1             | 27      |
|                                                                                                     | 27.10%    | 1.40%         | 16.10%  |
| <b>Neurological problems (e.g., dizziness, seizures, head pain, fainting, loss of coordination)</b> | 13        | 4             | 17      |
|                                                                                                     | 13.50%    | 5.60%         | 10.10%  |
| <b>Respiratory problems (e.g., difficulty breathing, coughing, shortness of breath)</b>             | 52        | 30            | 82      |
|                                                                                                     | 54.20%    | 41.70%        | 48.80%  |
| <b>Skin problems (e.g., rashes, hives, red skin, tingling skin, dermatitis)</b>                     | 16        | 15            | 31      |
|                                                                                                     | 16.70%    | 20.80%        | 18.50%  |
| <b>Cognitive problems (e.g., difficulties thinking, concentrating, or remembering)</b>              | 13        | 7             | 20      |
|                                                                                                     | 13.50%    | 9.70%         | 11.90%  |
| <b>Mucosal symptoms (e.g., watery or red eyes, nasal congestion, sneezing)</b>                      | 41        | 25            | 66      |
|                                                                                                     | 42.70%    | 34.70%        | 39.30%  |
| <b>Immune system problems (e.g., swollen lymph glands, fever, fatigue)</b>                          | 13        | 5             | 18      |
|                                                                                                     | 13.50%    | 6.90%         | 10.70%  |
| <b>Gastrointestinal problems (e.g., nausea, bloating, cramping, diarrhea)</b>                       | 13        | 3             | 16      |
|                                                                                                     | 13.50%    | 4.20%         | 9.50%   |
| <b>Cardiovascular problems (e.g., fast or irregular heartbeat, jitteriness, chest discomfort)</b>   | 12        | 2             | 14      |
|                                                                                                     | 12.50%    | 2.80%         | 8.30%   |
| <b>Musculoskeletal problems (e.g., muscle or joint pain, cramps, weakness)</b>                      | 8         | 3             | 11      |
|                                                                                                     | 8.30%     | 4.20%         | 6.50%   |
| <b>Other</b>                                                                                        | 2         | 5             | 7       |
|                                                                                                     | 2.10%     | 6.90%         | 4.20%   |
| <b>SUM</b>                                                                                          | 231       | 116           | 347     |
|                                                                                                     | 240.60%   | 161.10%       | 206.50% |

**Table 13**

**Q5. Do you experience any health problems from being near someone who is wearing a fragranced product?**

|                            | Asthmatic      | Non-Asthmatic  | GenPop          |
|----------------------------|----------------|----------------|-----------------|
| <b>Total</b>               | 313<br>100.00% | 785<br>100.00% | 1098<br>100.00% |
| <b>Yes</b>                 | 113<br>36.10%  | 100<br>12.70%  | 213<br>19.40%   |
| <b>No</b>                  | 171<br>54.60%  | 622<br>79.20%  | 793<br>72.20%   |
| <b>Don't know/not sure</b> | 28<br>8.90%    | 62<br>7.90%    | 90<br>8.20%     |
| <b>Decline to answer</b>   | 1<br>0.30%     | 1<br>0.10%     | 2<br>0.20%      |
| <b>SUM</b>                 | 313<br>100.00% | 785<br>100.00% | 1098<br>100.00% |

**Table 14**

**BA. Which of the following health problems do you experience?**

**Base: Respondents who experienced below health problems from being near someone who is wearing a fragranced product**

|                                                                                                     | Asthmatic | Non-Asthmatic | GenPop  |
|-----------------------------------------------------------------------------------------------------|-----------|---------------|---------|
| <b>Total</b>                                                                                        | 113       | 100           | 213     |
|                                                                                                     | 100.00%   | 100.00%       | 100.00% |
| <b>Migraine headaches</b>                                                                           | 23        | 31            | 54      |
|                                                                                                     | 20.40%    | 31.00%        | 25.40%  |
| <b>Asthma attacks</b>                                                                               | 33        | 4             | 37      |
|                                                                                                     | 29.20%    | 4.00%         | 17.40%  |
| <b>Neurological problems (e.g., dizziness, seizures, head pain, fainting, loss of coordination)</b> | 15        | 11            | 26      |
|                                                                                                     | 13.30%    | 11.00%        | 12.20%  |
| <b>Respiratory problems (e.g., difficulty breathing, coughing, shortness of breath)</b>             | 57        | 34            | 91      |
|                                                                                                     | 50.40%    | 34.00%        | 42.70%  |
| <b>Skin problems (e.g., rashes, hives, red skin, tingling skin, dermatitis)</b>                     | 13        | 6             | 19      |
|                                                                                                     | 11.50%    | 6.00%         | 8.90%   |
| <b>Cognitive problems (e.g., difficulties thinking, concentrating, or remembering)</b>              | 11        | 6             | 17      |
|                                                                                                     | 9.70%     | 6.00%         | 8.00%   |
| <b>Mucosal symptoms (e.g., watery or red eyes, nasal congestion, sneezing)</b>                      | 49        | 38            | 87      |
|                                                                                                     | 43.40%    | 38.00%        | 40.80%  |
| <b>Immune system problems (e.g., swollen lymph glands, fever, fatigue)</b>                          | 12        | 2             | 14      |
|                                                                                                     | 10.60%    | 2.00%         | 6.60%   |
| <b>Gastrointestinal problems (e.g., nausea, bloating, cramping, diarrhea)</b>                       | 7         | 9             | 16      |
|                                                                                                     | 6.20%     | 9.00%         | 7.50%   |
| <b>Cardiovascular problems (e.g., fast or irregular heartbeat, jitteriness, chest discomfort)</b>   | 9         | 4             | 13      |
|                                                                                                     | 8.00%     | 4.00%         | 6.10%   |
| <b>Musculoskeletal problems (e.g., muscle or joint pain, cramps, weakness)</b>                      | 11        | 2             | 13      |
|                                                                                                     | 9.70%     | 2.00%         | 6.10%   |
| <b>Other</b>                                                                                        | 2         | 7             | 9       |
|                                                                                                     | 1.80%     | 7.00%         | 4.20%   |
| <b>SUM</b>                                                                                          | 242       | 154           | 396     |
|                                                                                                     | 214.20%   | 154.00%       | 185.90% |

**Table 15**

**Q6. In general, do you experience any health problems from exposure to any type of fragranced product?**

|                            | Asthmatic      | Non-Asthmatic  | GenPop          |
|----------------------------|----------------|----------------|-----------------|
| <b>Total</b>               | 313<br>100.00% | 785<br>100.00% | 1098<br>100.00% |
| <b>Yes</b>                 | 124<br>39.60%  | 99<br>12.60%   | 223<br>20.30%   |
| <b>No</b>                  | 163<br>52.10%  | 615<br>78.30%  | 778<br>70.90%   |
| <b>Don't know/not sure</b> | 26<br>8.30%    | 70<br>8.90%    | 96<br>8.70%     |
| <b>Decline to answer</b>   | -<br>-         | 1<br>0.10%     | 1<br>0.10%      |
| <b>SUM</b>                 | 313<br>100.00% | 785<br>100.00% | 1098<br>100.00% |

**Table 16**

**BA. Which of the following health problems do you experience?**

**Base: Respondents who experienced below health problems from exposure to any type of fragranced product**

|                                                                                                     | Asthmatic | Non-Asthmatic | GenPop  |
|-----------------------------------------------------------------------------------------------------|-----------|---------------|---------|
| <b>Total</b>                                                                                        | 124       | 99            | 223     |
|                                                                                                     | 100.00%   | 100.00%       | 100.00% |
| <b>Migraine headaches</b>                                                                           | 27        | 24            | 51      |
|                                                                                                     | 21.80%    | 24.20%        | 22.90%  |
| <b>Asthma attacks</b>                                                                               | 39        | 1             | 40      |
|                                                                                                     | 31.50%    | 1.00%         | 17.90%  |
| <b>Neurological problems (e.g., dizziness, seizures, head pain, fainting, loss of coordination)</b> | 14        | 8             | 22      |
|                                                                                                     | 11.30%    | 8.10%         | 9.90%   |
| <b>Respiratory problems (e.g., difficulty breathing, coughing, shortness of breath)</b>             | 72        | 38            | 110     |
|                                                                                                     | 58.10%    | 38.40%        | 49.30%  |
| <b>Skin problems (e.g., rashes, hives, red skin, tingling skin, dermatitis)</b>                     | 30        | 24            | 54      |
|                                                                                                     | 24.20%    | 24.20%        | 24.20%  |
| <b>Cognitive problems (e.g., difficulties thinking, concentrating, or remembering)</b>              | 11        | 8             | 19      |
|                                                                                                     | 8.90%     | 8.10%         | 8.50%   |
| <b>Mucosal symptoms (e.g., watery or red eyes, nasal congestion, sneezing)</b>                      | 48        | 35            | 83      |
|                                                                                                     | 38.70%    | 35.40%        | 37.20%  |
| <b>Immune system problems (e.g., swollen lymph glands, fever, fatigue)</b>                          | 9         | 4             | 13      |
|                                                                                                     | 7.30%     | 4.00%         | 5.80%   |
| <b>Gastrointestinal problems (e.g., nausea, bloating, cramping, diarrhea)</b>                       | 8         | 6             | 14      |
|                                                                                                     | 6.50%     | 6.10%         | 6.30%   |
| <b>Cardiovascular problems (e.g., fast or irregular heartbeat, jitteriness, chest discomfort)</b>   | 10        | 3             | 13      |
|                                                                                                     | 8.10%     | 3.00%         | 5.80%   |
| <b>Musculoskeletal problems (e.g., muscle or joint pain, cramps, weakness)</b>                      | 9         | 2             | 11      |
|                                                                                                     | 7.30%     | 2.00%         | 4.90%   |
| <b>Other</b>                                                                                        | 3         | 5             | 8       |
|                                                                                                     | 2.40%     | 5.10%         | 3.60%   |
| <b>SUM</b>                                                                                          | 280       | 158           | 438     |
|                                                                                                     | 225.80%   | 159.60%       | 196.40% |



**Table 17**

**B2. Do any of these health problems mean a total or partial loss of bodily or mental functions, for you personally?**

|                            | Asthmatic      | Non-Asthmatic  | GenPop         |
|----------------------------|----------------|----------------|----------------|
| <b>Total</b>               | 174<br>100.00% | 188<br>100.00% | 362<br>100.00% |
| <b>Yes</b>                 | 47<br>27.00%   | 15<br>8.00%    | 62<br>17.10%   |
| <b>No</b>                  | 113<br>64.90%  | 156<br>83.00%  | 269<br>74.30%  |
| <b>Don't know/not sure</b> | 14<br>8.00%    | 17<br>9.00%    | 31<br>8.60%    |
| <b>Decline to answer</b>   | -              | -              | -              |
| <b>SUM</b>                 | 174<br>100.00% | 188<br>100.00% | 362<br>100.00% |

**Table 18**

**Q9. Has a doctor or health care professional ever told you that you have asthma or an asthma-like condition?**

|                                    | Asthmatic      | Non-Asthmatic  | GenPop          |
|------------------------------------|----------------|----------------|-----------------|
| <b>Total</b>                       | 313<br>100.00% | 785<br>100.00% | 1098<br>100.00% |
| <b>Yes - asthma</b>                | 176<br>56.20%  | -              | 176<br>16.00%   |
| <b>Yes - asthma-like condition</b> | 151<br>48.20%  | -              | 151<br>13.80%   |
| <b>No</b>                          | -              | 740<br>94.30%  | 740<br>67.40%   |
| <b>Don't know/not sure</b>         | -              | 43<br>5.50%    | 43<br>3.90%     |
| <b>Decline to answer</b>           | -              | 2<br>0.30%     | 2<br>0.20%      |
| <b>SUM</b>                         | 327<br>104.50% | 785<br>100.00% | 1112<br>101.30% |

**Table 19**

Have you ever been unable or reluctant to use the toilets in a public place, because of the presence of an air freshener, deodorizer, or scented product?

|                          | Asthmatic      | Non-Asthmatic  | GenPop          |
|--------------------------|----------------|----------------|-----------------|
| <b>Total</b>             | 313<br>100.00% | 785<br>100.00% | 1098<br>100.00% |
| <b>Yes</b>               | 67<br>21.40%   | 60<br>7.60%    | 127<br>11.60%   |
| <b>No</b>                | 235<br>75.10%  | 685<br>87.30%  | 920<br>83.80%   |
| <b>Neutral/not sure</b>  | 11<br>3.50%    | 38<br>4.80%    | 49<br>4.50%     |
| <b>Decline to answer</b> | -<br>-         | 2<br>0.30%     | 2<br>0.20%      |
| <b>SUM</b>               | 313<br>100.00% | 785<br>100.00% | 1098<br>100.00% |

**Table 20**

If you enter a business, and you smell air fresheners or some fragranced product, do you want to leave as quickly as possible?

|                          | Asthmatic      | Non-Asthmatic  | GenPop          |
|--------------------------|----------------|----------------|-----------------|
| <b>Total</b>             | 313<br>100.00% | 785<br>100.00% | 1098<br>100.00% |
| <b>Yes</b>               | 97<br>31.00%   | 86<br>11.00%   | 183<br>16.70%   |
| <b>No</b>                | 167<br>53.40%  | 606<br>77.20%  | 773<br>70.40%   |
| <b>Neutral/not sure</b>  | 49<br>15.70%   | 92<br>11.70%   | 141<br>12.80%   |
| <b>Decline to answer</b> | -              | 1<br>0.10%     | 1<br>0.10%      |
| <b>SUM</b>               | 313<br>100.00% | 785<br>100.00% | 1098<br>100.00% |

**Table 21**

Have you ever been unable or reluctant to wash your hands with soap in a public place, because you know or suspect that the soap is fragranced?

|                          | Asthmatic      | Non-Asthmatic  | GenPop          |
|--------------------------|----------------|----------------|-----------------|
| <b>Total</b>             | 313<br>100.00% | 785<br>100.00% | 1098<br>100.00% |
| <b>Yes</b>               | 65<br>20.80%   | 48<br>6.10%    | 113<br>10.30%   |
| <b>No</b>                | 232<br>74.10%  | 679<br>86.50%  | 911<br>83.00%   |
| <b>Neutral/not sure</b>  | 16<br>5.10%    | 56<br>7.10%    | 72<br>6.60%     |
| <b>Decline to answer</b> | -<br>-         | 2<br>0.30%     | 2<br>0.20%      |
| <b>SUM</b>               | 313<br>100.00% | 785<br>100.00% | 1098<br>100.00% |

**Table 22**

Are you aware that a “fragrance” in a product is typically a chemical mixture of several dozen to several hundred chemicals, mostly synthetic and derived from natural sources?

|                            | Asthmatic      | Non-Asthmatic  | GenPop          |
|----------------------------|----------------|----------------|-----------------|
| <b>Total</b>               | 313<br>100.00% | 785<br>100.00% | 1098<br>100.00% |
| <b>Yes</b>                 | 154<br>49.20%  | 292<br>37.20%  | 446<br>40.60%   |
| <b>No</b>                  | 132<br>42.20%  | 386<br>49.20%  | 518<br>47.20%   |
| <b>Don't know/not sure</b> | 27<br>8.60%    | 105<br>13.40%  | 132<br>12.00%   |
| <b>Decline to answer</b>   | -<br>-         | 2<br>0.30%     | 2<br>0.20%      |
| <b>SUM</b>                 | 313<br>100.00% | 785<br>100.00% | 1098<br>100.00% |

**Table 23**

Are you aware that fragrance chemicals do not need to be fully disclosed on the product label or material safety data sheet?

|                            | Asthmatic      | Non-Asthmatic  | GenPop          |
|----------------------------|----------------|----------------|-----------------|
| <b>Total</b>               | 313<br>100.00% | 785<br>100.00% | 1098<br>100.00% |
| <b>Yes</b>                 | 71<br>22.70%   | 126<br>16.10%  | 197<br>17.90%   |
| <b>No</b>                  | 210<br>67.10%  | 543<br>69.20%  | 753<br>68.60%   |
| <b>Don't know/not sure</b> | 32<br>10.20%   | 113<br>14.40%  | 145<br>13.20%   |
| <b>Decline to answer</b>   | -              | 3<br>0.40%     | 3<br>0.30%      |
| <b>SUM</b>                 | 313<br>100.00% | 785<br>100.00% | 1098<br>100.00% |

**Table 24**

Are you aware that fragranced products typically emit hazardous air pollutants such as formaldehyde?

|                            | Asthmatic      | Non-Asthmatic  | GenPop          |
|----------------------------|----------------|----------------|-----------------|
| <b>Total</b>               | 313<br>100.00% | 785<br>100.00% | 1098<br>100.00% |
| <b>Yes</b>                 | 81<br>25.90%   | 122<br>15.50%  | 203<br>18.50%   |
| <b>No</b>                  | 207<br>66.10%  | 550<br>70.10%  | 757<br>68.90%   |
| <b>Don't know/not sure</b> | 24<br>7.70%    | 110<br>14.00%  | 134<br>12.20%   |
| <b>Decline to answer</b>   | 1<br>0.30%     | 3<br>0.40%     | 4<br>0.40%      |
| <b>SUM</b>                 | 313<br>100.00% | 785<br>100.00% | 1098<br>100.00% |



**Table 25**

Are you aware that even so-called natural, green, and organic fragranced products typically emit hazardous air pollutants?

|                            | Asthmatic      | Non-Asthmatic  | GenPop          |
|----------------------------|----------------|----------------|-----------------|
| <b>Total</b>               | 313<br>100.00% | 785<br>100.00% | 1098<br>100.00% |
| <b>Yes</b>                 | 68<br>21.70%   | 96<br>12.20%   | 164<br>14.90%   |
| <b>No</b>                  | 220<br>70.30%  | 589<br>75.00%  | 809<br>73.70%   |
| <b>Don't know/not sure</b> | 24<br>7.70%    | 97<br>12.40%   | 121<br>11.00%   |
| <b>Decline to answer</b>   | 1<br>0.30%     | 3<br>0.40%     | 4<br>0.40%      |
| <b>SUM</b>                 | 313<br>100.00% | 785<br>100.00% | 1098<br>100.00% |

**Table 26**

**If you knew that a fragranced product emitted hazardous air pollutants, would you still use it?**

|                            | Asthmatic      | Non-Asthmatic  | GenPop          |
|----------------------------|----------------|----------------|-----------------|
| <b>Total</b>               | 313<br>100.00% | 785<br>100.00% | 1098<br>100.00% |
| <b>Yes</b>                 | 47<br>15.00%   | 97<br>12.40%   | 144<br>13.10%   |
| <b>No</b>                  | 188<br>60.10%  | 430<br>54.80%  | 618<br>56.30%   |
| <b>Don't know/not sure</b> | 78<br>24.90%   | 256<br>32.60%  | 334<br>30.40%   |
| <b>Decline to answer</b>   | -              | 2<br>0.30%     | 2<br>0.20%      |
| <b>SUM</b>                 | 313<br>100.00% | 785<br>100.00% | 1098<br>100.00% |

**Table 27**

Have you ever been prevented from going to some place because you would be exposed to a fragrance product that would make you sick?

|                            | Asthmatic      | Non-Asthmatic  | GenPop          |
|----------------------------|----------------|----------------|-----------------|
| <b>Total</b>               | 313<br>100.00% | 785<br>100.00% | 1098<br>100.00% |
| <b>Yes</b>                 | 100<br>31.90%  | 65<br>8.30%    | 165<br>15.00%   |
| <b>No</b>                  | 188<br>60.10%  | 644<br>82.00%  | 832<br>75.80%   |
| <b>Don't know/not sure</b> | 25<br>8.00%    | 74<br>9.40%    | 99<br>9.00%     |
| <b>Decline to answer</b>   | -<br>-         | 2<br>0.30%     | 2<br>0.20%      |
| <b>SUM</b>                 | 313<br>100.00% | 785<br>100.00% | 1098<br>100.00% |

**Table 28**

Has any exposure to fragranced products in your work environment caused you to become sick, lose work days, or lose a job?

|                            | Asthmatic      | Non-Asthmatic  | GenPop          |
|----------------------------|----------------|----------------|-----------------|
| <b>Total</b>               | 313<br>100.00% | 785<br>100.00% | 1098<br>100.00% |
| <b>Yes</b>                 | 57<br>18.20%   | 28<br>3.60%    | 85<br>7.70%     |
| <b>No</b>                  | 233<br>74.40%  | 696<br>88.70%  | 929<br>84.60%   |
| <b>Don't know/not sure</b> | 23<br>7.30%    | 58<br>7.40%    | 81<br>7.40%     |
| <b>Decline to answer</b>   | -              | 3<br>0.40%     | 3<br>0.30%      |
| <b>SUM</b>                 | 313<br>100.00% | 785<br>100.00% | 1098<br>100.00% |

**Table 29**

**Would you be supportive of a fragrance-free policy in the workplace?**

|                          | Asthmatic      | Non-Asthmatic  | GenPop          |
|--------------------------|----------------|----------------|-----------------|
| <b>Total</b>             | 313<br>100.00% | 785<br>100.00% | 1098<br>100.00% |
| <b>Yes</b>               | 158<br>50.50%  | 312<br>39.70%  | 470<br>42.80%   |
| <b>No</b>                | 58<br>18.50%   | 186<br>23.70%  | 244<br>22.20%   |
| <b>Neutral/not sure</b>  | 97<br>31.00%   | 284<br>36.20%  | 381<br>34.70%   |
| <b>Decline to answer</b> | -<br>-         | 3<br>0.40%     | 3<br>0.30%      |
| <b>SUM</b>               | 313<br>100.00% | 785<br>100.00% | 1098<br>100.00% |

**Table 30**

**Would you prefer that health care facilities and health care professionals be fragrance-free?**

|                          | Asthmatic      | Non-Asthmatic  | GenPop          |
|--------------------------|----------------|----------------|-----------------|
| <b>Total</b>             | 313<br>100.00% | 785<br>100.00% | 1098<br>100.00% |
| <b>Yes</b>               | 157<br>50.20%  | 317<br>40.40%  | 474<br>43.20%   |
| <b>No</b>                | 78<br>24.90%   | 199<br>25.40%  | 277<br>25.20%   |
| <b>Neutral/not sure</b>  | 77<br>24.60%   | 265<br>33.80%  | 342<br>31.10%   |
| <b>Decline to answer</b> | 1<br>0.30%     | 4<br>0.50%     | 5<br>0.50%      |
| <b>SUM</b>               | 313<br>100.00% | 785<br>100.00% | 1098<br>100.00% |

**Table 31**

**Flying On An Airplane That Pumped / Did Not Pump Scented Air Throughout The Passenger Cabin, Which Would You Choose?**

|                                     | Asthmatic      | Non-Asthmatic  | GenPop          |
|-------------------------------------|----------------|----------------|-----------------|
| <b>Total</b>                        | 313<br>100.00% | 785<br>100.00% | 1098<br>100.00% |
| <b>Airplane with scented air</b>    | 58<br>18.50%   | 121<br>15.40%  | 179<br>16.30%   |
| <b>Airplane without scented air</b> | 196<br>62.60%  | 438<br>55.80%  | 634<br>57.70%   |
| <b>Neutral/not sure</b>             | 59<br>18.80%   | 224<br>28.50%  | 283<br>25.80%   |
| <b>Decline to answer</b>            | -<br>-         | 2<br>0.30%     | 2<br>0.20%      |
| <b>SUM</b>                          | 313<br>100.00% | 785<br>100.00% | 1098<br>100.00% |

**Table 32**

**Staying In A Hotel With / Without Fragranced Air, Which Would You Choose?**

|                                     | Asthmatic      | Non-Asthmatic  | GenPop          |
|-------------------------------------|----------------|----------------|-----------------|
| <b>Total</b>                        | 313<br>100.00% | 785<br>100.00% | 1098<br>100.00% |
| <b>Hotel with fragranced air</b>    | 73<br>23.30%   | 176<br>22.40%  | 249<br>22.70%   |
| <b>Hotel without fragranced air</b> | 188<br>60.10%  | 422<br>53.80%  | 610<br>55.60%   |
| <b>Neutral/not sure</b>             | 52<br>16.60%   | 185<br>23.60%  | 237<br>21.60%   |
| <b>Decline to answer</b>            | -<br>-         | 2<br>0.30%     | 2<br>0.20%      |
| <b>SUM</b>                          | 313<br>100.00% | 785<br>100.00% | 1098<br>100.00% |



**Table 33**

What is your household annual income?

|                                     | Asthmatic      | Non-Asthmatic  | GenPop          |
|-------------------------------------|----------------|----------------|-----------------|
| <b>Total</b>                        | 313<br>100.00% | 785<br>100.00% | 1098<br>100.00% |
| <b>Less than \$10,000 (10)</b>      | 12<br>3.80%    | 30<br>3.80%    | 42<br>3.80%     |
| <b>\$10,000 - \$49,999 (29.99)</b>  | 81<br>25.90%   | 156<br>19.90%  | 237<br>21.60%   |
| <b>\$50,000 - \$99,999 (74.99)</b>  | 97<br>31.00%   | 278<br>35.40%  | 375<br>34.20%   |
| <b>\$100,000-\$149,999 (124.99)</b> | 54<br>17.30%   | 152<br>19.40%  | 206<br>18.80%   |
| <b>\$150,000-\$200,000 (175)</b>    | 21<br>6.70%    | 60<br>7.60%    | 81<br>7.40%     |
| <b>Over \$200,000 (200)</b>         | 13<br>4.20%    | 24<br>3.10%    | 37<br>3.40%     |
| <b>Decline to answer</b>            | 35<br>11.20%   | 85<br>10.80%   | 120<br>10.90%   |
| <b>Mean (In Thousands)</b>          | 82.19          | 85.89          | 84.84           |
| <b>Standard Deviation</b>           | 51.98          | 49.53          | 50.24           |
| <b>Standard Error</b>               | 3.12           | 1.87           | 1.61            |
| <b>SUM</b>                          | 313<br>100.00% | 785<br>100.00% | 1098<br>100.00% |

**Table 34**

**Q1. Who Answer "Yes" To One Or More Of These Options For Q1.**

|                                                                                               | Asthmatic | Non-Asthmatic | GenPop  |
|-----------------------------------------------------------------------------------------------|-----------|---------------|---------|
| <b>Total</b>                                                                                  | 313       | 785           | 1098    |
|                                                                                               | 100.00%   | 100.00%       | 100.00% |
| <b>Yes (Net)</b>                                                                              | 310       | 766           | 1076    |
|                                                                                               | 99.00%    | 97.60%        | 98.00%  |
| Air fresheners and deodorizers (e.g., sprays, solids, oils, disks)                            | 220       | 513           | 733     |
|                                                                                               | 70.30%    | 65.40%        | 66.80%  |
| Personal care products (e.g., soaps, hand sanitizer, lotions, deodorant, sunscreen, shampoos) | 293       | 713           | 1006    |
|                                                                                               | 93.60%    | 90.80%        | 91.60%  |
| Cleaning supplies (e.g., all-purpose cleaners, disinfectants, and dishwashing soap)           | 263       | 650           | 913     |
|                                                                                               | 84.00%    | 82.80%        | 83.20%  |
| Laundry products (e.g., detergents, fabric softeners, dryer sheets)                           | 273       | 653           | 926     |
|                                                                                               | 87.20%    | 83.20%        | 84.30%  |
| Household products (e.g., scented candles, toilet paper, trash bags, baby products)           | 247       | 600           | 847     |
|                                                                                               | 78.90%    | 76.40%        | 77.10%  |
| Fragrance (e.g., perfume, cologne, after-shave)                                               | 223       | 541           | 764     |
|                                                                                               | 71.20%    | 68.90%        | 69.60%  |
| Other                                                                                         | 5         | 20            | 25      |
|                                                                                               | 1.60%     | 2.50%         | 2.30%   |
| <b>None</b>                                                                                   | 3         | 19            | 22      |
|                                                                                               | 1.00%     | 2.40%         | 2.00%   |
| <b>SUM</b>                                                                                    | 1527      | 3709          | 5236    |
|                                                                                               | 487.90%   | 472.50%       | 476.90% |

**Table 35**

**Q1a. Who Answer "Yes" To One Or More Of These Options For Q1A.**

|                                                                                               | Asthmatic | Non-Asthmatic | GenPop  |
|-----------------------------------------------------------------------------------------------|-----------|---------------|---------|
| <b>Total</b>                                                                                  | 313       | 785           | 1098    |
|                                                                                               | 100.00%   | 100.00%       | 100.00% |
| <b>Yes (Net)</b>                                                                              | 289       | 678           | 967     |
|                                                                                               | 92.30%    | 86.40%        | 88.10%  |
| Air fresheners and deodorizers (e.g., sprays, solids, oils, disks)                            | 174       | 384           | 558     |
|                                                                                               | 55.60%    | 48.90%        | 50.80%  |
| Personal care products (e.g., soaps, hand sanitizer, lotions, deodorant, sunscreen, shampoos) | 206       | 469           | 675     |
|                                                                                               | 65.80%    | 59.70%        | 61.50%  |
| Cleaning supplies (e.g., all-purpose cleaners, disinfectants, and dishwashing soap)           | 169       | 388           | 557     |
|                                                                                               | 54.00%    | 49.40%        | 50.70%  |
| Laundry products (e.g., detergents, fabric softeners, dryer sheets)                           | 140       | 346           | 486     |
|                                                                                               | 44.70%    | 44.10%        | 44.30%  |
| Household products (e.g., scented candles, toilet paper, trash bags, baby products)           | 162       | 383           | 545     |
|                                                                                               | 51.80%    | 48.80%        | 49.60%  |
| Fragrance (e.g., perfume, cologne, after-shave)                                               | 237       | 507           | 744     |
|                                                                                               | 75.70%    | 64.60%        | 67.80%  |
| Other                                                                                         | 6         | 14            | 20      |
|                                                                                               | 1.90%     | 1.80%         | 1.80%   |
| <b>None</b>                                                                                   | 24        | 107           | 131     |
|                                                                                               | 7.70%     | 13.60%        | 11.90%  |
| <b>SUM</b>                                                                                    | 1118      | 2598          | 3716    |
|                                                                                               | 357.20%   | 331.00%       | 338.40% |

**Table 36**

**Q1/Q1a. Who Answer "Yes" To One Or More Of These Options For Q1/Q1A (own use, other's use).**

|                                                                                               | Asthmatic | Non-Asthmatic | GenPop  |
|-----------------------------------------------------------------------------------------------|-----------|---------------|---------|
| <b>Total</b>                                                                                  | 313       | 785           | 1098    |
|                                                                                               | 100.00%   | 100.00%       | 100.00% |
| <b>Yes (Net)</b>                                                                              | 312       | 770           | 1082    |
|                                                                                               | 99.70%    | 98.10%        | 98.50%  |
| Air fresheners and deodorizers (e.g., sprays, solids, oils, disks)                            | 250       | 576           | 826     |
|                                                                                               | 79.90%    | 73.40%        | 75.20%  |
| Personal care products (e.g., soaps, hand sanitizer, lotions, deodorant, sunscreen, shampoos) | 302       | 730           | 1032    |
|                                                                                               | 96.50%    | 93.00%        | 94.00%  |
| Cleaning supplies (e.g., all-purpose cleaners, disinfectants, and dishwashing soap)           | 280       | 684           | 964     |
|                                                                                               | 89.50%    | 87.10%        | 87.80%  |
| Laundry products (e.g., detergents, fabric softeners, dryer sheets)                           | 286       | 695           | 981     |
|                                                                                               | 91.40%    | 88.50%        | 89.30%  |
| Household products (e.g., scented candles, toilet paper, trash bags, baby products)           | 265       | 635           | 900     |
|                                                                                               | 84.70%    | 80.90%        | 82.00%  |
| Fragrance (e.g., perfume, cologne, after-shave)                                               | 275       | 628           | 903     |
|                                                                                               | 87.90%    | 80.00%        | 82.20%  |
| Other                                                                                         | 8         | 26            | 34      |
|                                                                                               | 2.60%     | 3.30%         | 3.10%   |
| <b>None</b>                                                                                   | 26        | 111           | 137     |
|                                                                                               | 8.30%     | 14.10%        | 12.50%  |
| <b>SUM</b>                                                                                    | 1692      | 4085          | 5777    |
|                                                                                               | 540.60%   | 520.40%       | 526.10% |

**Table 37**

**Q2/Q3/Q4/Q5/Q6. People Who Answer "Yes" To One Or More Of These Questions: Q2/Q3/Q4/Q5/Q6 (fragrance sensitive group).**

|       | Asthmatic      | Non-Asthmatic  | GenPop          |
|-------|----------------|----------------|-----------------|
| Total | 313<br>100.00% | 785<br>100.00% | 1098<br>100.00% |
| Yes   | 174<br>55.60%  | 188<br>23.90%  | 362<br>33.00%   |

Table 38

BA-Q2/Q3/Q4/Q5/Q6. People who answer "Yes" to each type of health problem under BA for each of these questions Q2/Q3/Q4/Q5/Q6.

|                                                                                                     | Asthmatic | Non-Asthmatic | GenPop  |
|-----------------------------------------------------------------------------------------------------|-----------|---------------|---------|
| <b>Total</b>                                                                                        | 313       | 785           | 1098    |
|                                                                                                     | 100.00%   | 100.00%       | 100.00% |
| <b>Migraine headaches</b>                                                                           | 53        | 57            | 110     |
|                                                                                                     | 16.90%    | 7.30%         | 10.00%  |
| <b>Asthma attacks</b>                                                                               | 75        | 8             | 83      |
|                                                                                                     | 24.00%    | 1.00%         | 7.60%   |
| <b>Neurological problems (e.g., dizziness, seizures, head pain, fainting, loss of coordination)</b> | 28        | 21            | 49      |
|                                                                                                     | 8.90%     | 2.70%         | 4.50%   |
| <b>Respiratory problems (e.g., difficulty breathing, coughing, shortness of breath)</b>             | 106       | 77            | 183     |
|                                                                                                     | 33.90%    | 9.80%         | 16.70%  |
| <b>Skin problems (e.g., rashes, hives, red skin, tingling skin, dermatitis)</b>                     | 52        | 52            | 104     |
|                                                                                                     | 16.60%    | 6.60%         | 9.50%   |
| <b>Cognitive problems (e.g., difficulties thinking, concentrating, or remembering)</b>              | 27        | 18            | 45      |
|                                                                                                     | 8.60%     | 2.30%         | 4.10%   |
| <b>Mucosal symptoms (e.g., watery or red eyes, nasal congestion, sneezing)</b>                      | 83        | 71            | 154     |
|                                                                                                     | 26.50%    | 9.00%         | 14.00%  |
| <b>Immune system problems (e.g., swollen lymph glands, fever, fatigue)</b>                          | 24        | 12            | 36      |
|                                                                                                     | 7.70%     | 1.50%         | 3.30%   |
| <b>Gastrointestinal problems (e.g., nausea, bloating, cramping, diarrhea)</b>                       | 21        | 15            | 36      |
|                                                                                                     | 6.70%     | 1.90%         | 3.30%   |
| <b>Cardiovascular problems (e.g., fast or irregular heartbeat, jitteriness, chest discomfort)</b>   | 21        | 12            | 33      |
|                                                                                                     | 6.70%     | 1.50%         | 3.00%   |
| <b>Musculoskeletal problems (e.g., muscle or joint pain, cramps, weakness)</b>                      | 18        | 11            | 29      |
|                                                                                                     | 5.80%     | 1.40%         | 2.60%   |
| <b>Other</b>                                                                                        | 5         | 16            | 21      |
|                                                                                                     | 1.60%     | 2.00%         | 1.90%   |

**Table 39**

Demographics.

|                      | Asthmatic | Non-Asthmatic | GenPop  |
|----------------------|-----------|---------------|---------|
| <b>Total</b>         | 313       | 785           | 1098    |
|                      | 100.00%   | 100.00%       | 100.00% |
| <b>Male/Female</b>   |           |               |         |
| <b>All Males</b>     | 143       | 400           | 543     |
|                      | 45.70%    | 51.00%        | 49.50%  |
| <b>All Females</b>   | 170       | 385           | 555     |
|                      | 54.30%    | 49.00%        | 50.50%  |
| <b>Gender vs Age</b> |           |               |         |
| <b>Male 18-24</b>    | 16        | 54            | 70      |
|                      | 5.10%     | 6.90%         | 6.40%   |
| <b>Male 25-34</b>    | 34        | 75            | 109     |
|                      | 10.90%    | 9.60%         | 9.90%   |
| <b>Male 35-44</b>    | 33        | 86            | 119     |
|                      | 10.50%    | 11.00%        | 10.80%  |
| <b>Male 45-54</b>    | 34        | 92            | 126     |
|                      | 10.90%    | 11.70%        | 11.50%  |
| <b>Male 55-65</b>    | 26        | 93            | 119     |
|                      | 8.30%     | 11.80%        | 10.80%  |
| <b>Female 18-24</b>  | 26        | 60            | 86      |
|                      | 8.30%     | 7.60%         | 7.80%   |
| <b>Female 25-34</b>  | 35        | 95            | 130     |
|                      | 11.20%    | 12.10%        | 11.80%  |
| <b>Female 35-44</b>  | 42        | 95            | 137     |
|                      | 13.40%    | 12.10%        | 12.50%  |
| <b>Female 45-54</b>  | 41        | 74            | 115     |
|                      | 13.10%    | 9.40%         | 10.50%  |
| <b>Female 55-65</b>  | 26        | 61            | 87      |
|                      | 8.30%     | 7.80%         | 7.90%   |
